# Supplementary material for: Thermoresponsive functional polymers based on 2,6-diaminopyridine motif with tunable UCST behaviour in water/alcohol mixtures
Source: Royal Society of Chemistry journal article supplement (doi:10.1039/c7py00539c), 2017-01-01
Supplement: c7py00539c1.pdf [file c7py00539c1.pdf]

## Supporting Information

### Thermoresponsive functional polymers based on 2,6-diamino pyridine motif with tunable UCST behaviour in water/alcohol mixtures

Asad Asadujjaman,<sup>a</sup> Vahid Ahmadi,<sup>a</sup> Meral Yalcin,<sup>b</sup> Niels ten Brummelhuis\*<sup>b</sup> and Annabelle Bertin\*<sup>a, c</sup>

<sup>a</sup>Bundesanstalt für Materialforschung und -prüfung (BAM), Unter den Eichen 87, 12205 Berlin, Germany.

<sup>b</sup>Humboldt-Universität zu Berlin, Department of Chemistry, Brook-Taylor-Str. 2, 12489 Berlin, Germany.

<sup>c</sup>Freie Universität Berlin, Institute of Chemistry and Biochemistry– Organic Chemistry, Takustr. 3, 14195 Berlin, Germany.

#### Synthesis of PNAPAAm and PNAcAPAAm:

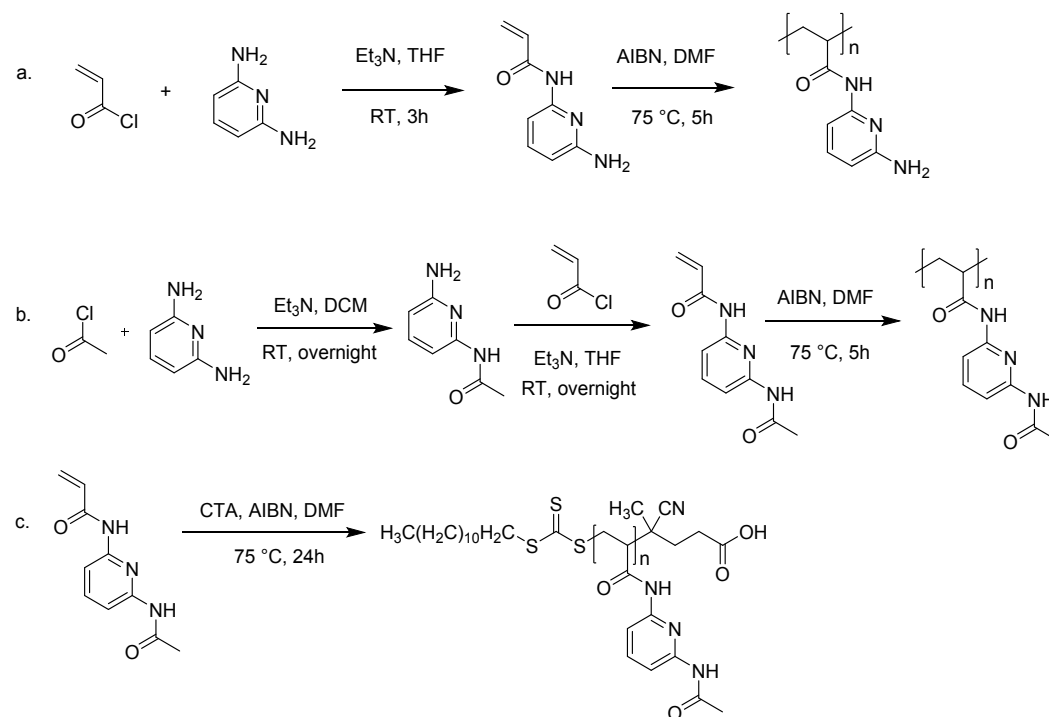

**Scheme S1.** Synthesis procedure for (a) PNAPAAm and (b) PNAcAPAAm via free radical polymerization (FRP) and (c) synthesis of PNAcAPAAm via RAFT polymerization.

**Table S1.** Summary of the PNAPAAm and PNAcAPAAm synthesis.

| Polymer type | Polymerization technique | Name of polymers         | Monomer (mg) | AIBN (mg) | RAFT agent (mg) | DMF (mL) | Yield (%) |
|--------------|--------------------------|--------------------------|--------------|-----------|-----------------|----------|-----------|
| PNAPAAm      | FRP                      | PNAPAAm <sub>67</sub>    | 410          | 4.1       | X               | 5.0      | 91        |
|              | FRP                      | PNAPAAm <sub>87</sub>    | 410          | 2.6       | X               | 5.0      | 88        |
| PNAcAPAAm    | FRP                      | PNAcAPAAm <sub>54</sub>  | 510          | 8.2       | X               | 5.0      | 93        |
|              | FRP                      | PNAcAPAAm <sub>88</sub>  | 510          | 4.1       | X               | 5.0      | 88        |
|              | FRP                      | PNAcAPAAm <sub>597</sub> | 510          | 2.6       | X               | 5.0      | 91        |
|              | RAFT                     | PNAcAPAAm <sub>29</sub>  | 255          | 1.0       | 10              | 4.3      | 60        |
|              | RFAT                     | PNAcAPAAm <sub>41</sub>  | 508          | 1.0       | 10              | 8.6      | 63        |

## Characterization of the monomers

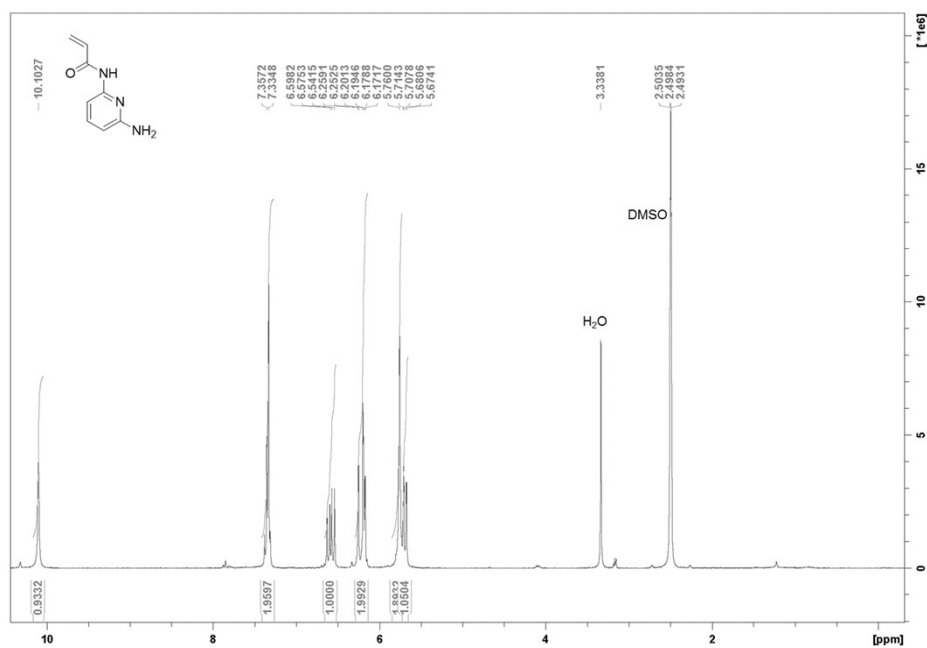

Fig. S1. <sup>1</sup>H-NMR spectrum of *N*-(6-aminopyridin-2-yl)acrylamide measured in DMSO-d<sub>6</sub>.

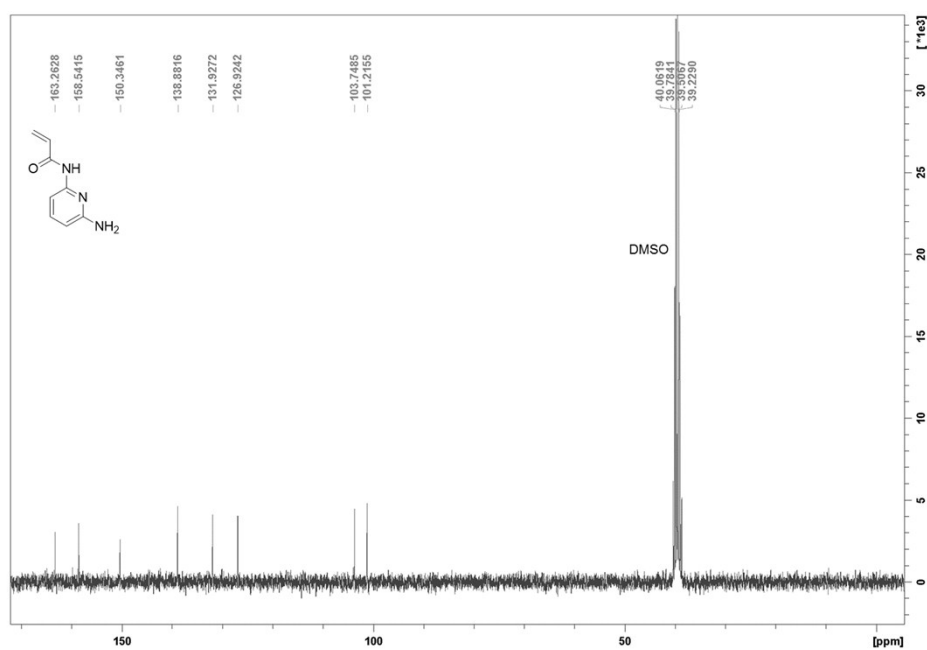

Fig. S2. <sup>13</sup>C-NMR spectrum of *N*-(6-aminopyridin-2-yl)acrylamide measured in DMSO-d<sub>6</sub>.

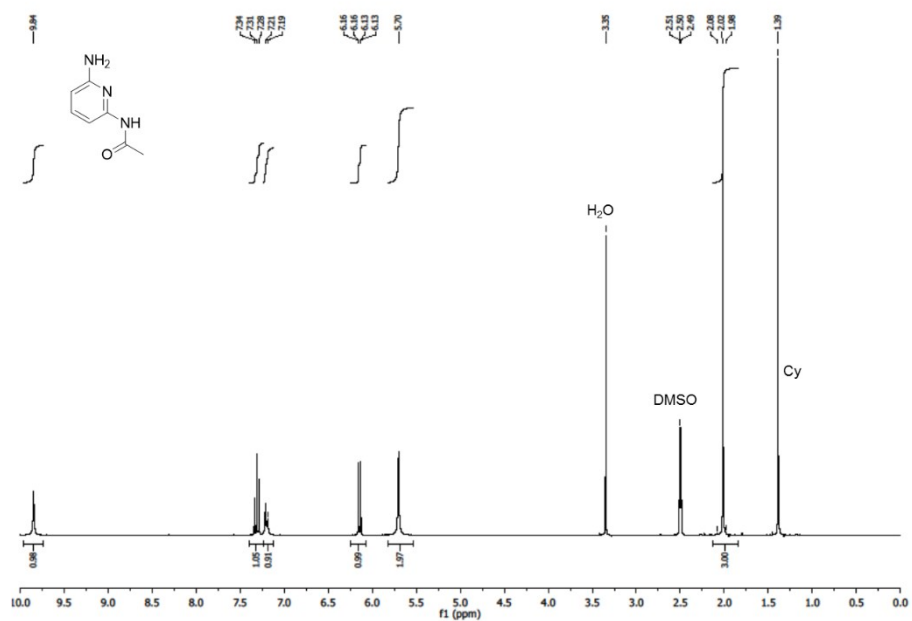

**Fig. S3.** <sup>1</sup>H-NMR spectrum of *N*-(6-aminopyridin-2-yl)acetamide measured in CDCl<sub>3</sub>.

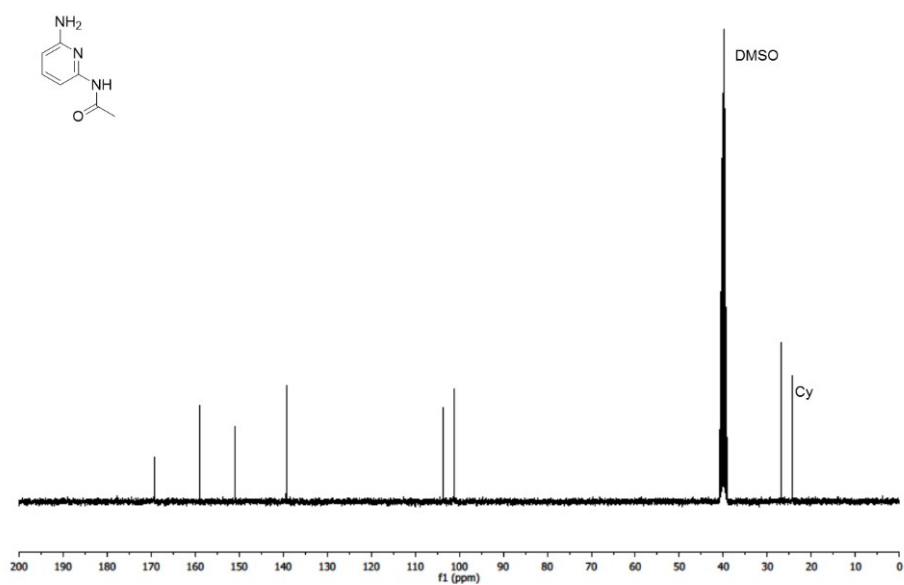

**Fig. S4.** <sup>13</sup>C-NMR spectrum of *N*-(6-aminopyridin-2-yl)acetamide measured in DMSO-d<sub>6</sub>.

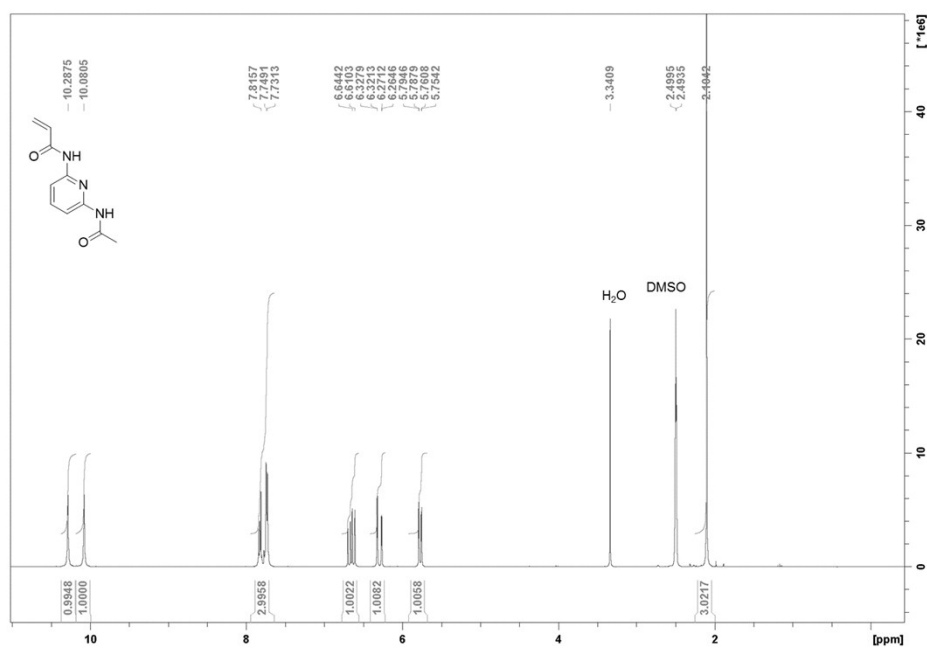

**Fig. S5.**  $^1\text{H}$ -NMR spectrum of *N*-(6-acetamidopyridin-2-yl)acrylamide measured in DMSO- $d_6$ .

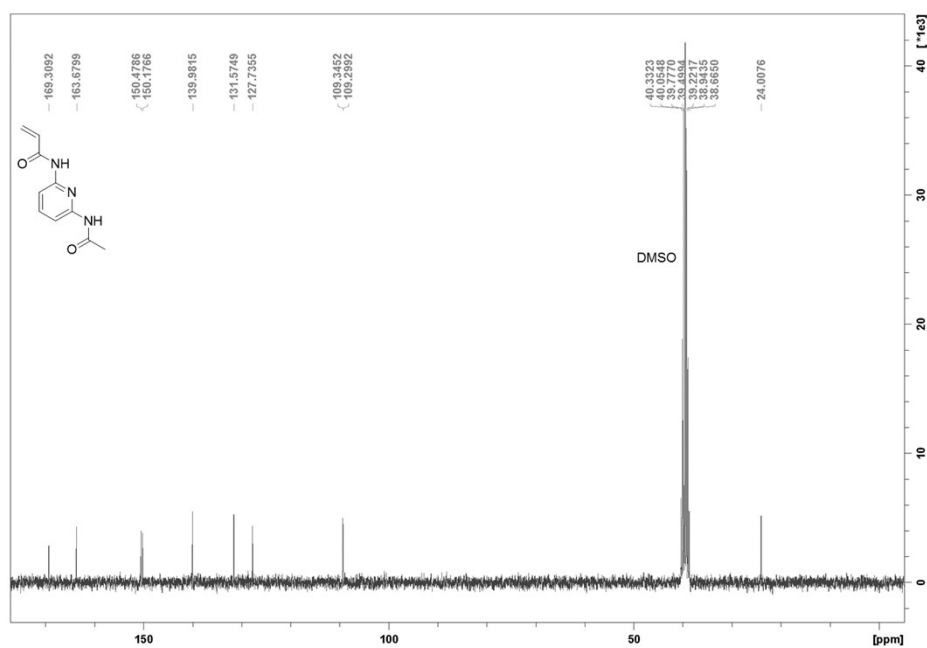

**Fig. S6.**  $^{13}\text{C}$ -NMR spectrum of *N*-(6-acetamidopyridin-2-yl)acrylamide measured in DMSO- $d_6$ .

## Characterization of the polymers

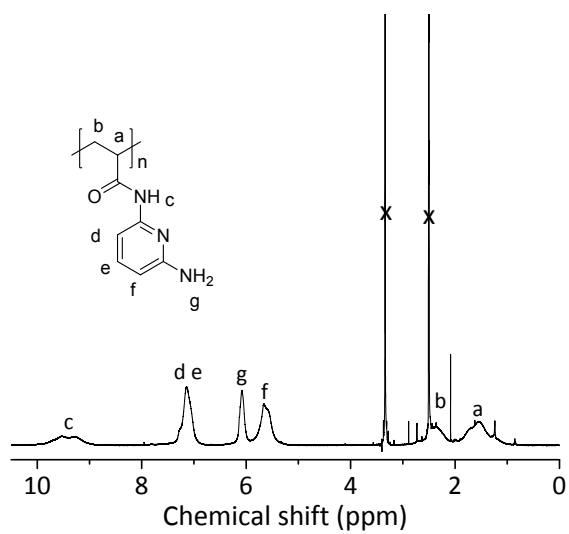

**Fig. S7.** <sup>1</sup>H-NMR spectrum of poly(*N*-(6-aminopyridin-2-yl)acrylamide) (PNAPAAm) measured in DMSO-d<sub>6</sub>.

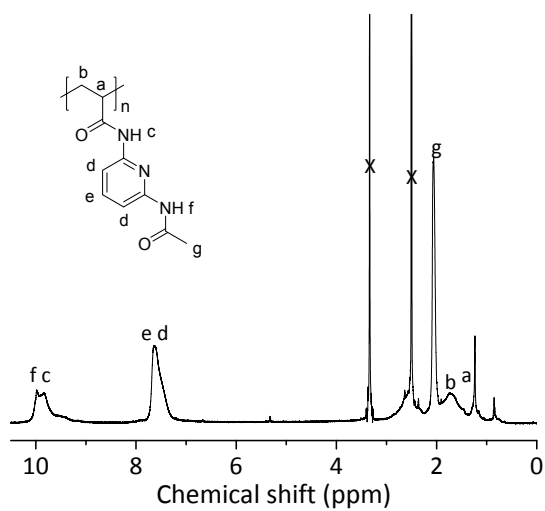

**Fig. S8.** <sup>1</sup>H-NMR spectrum of poly(*N*-(6-acetamidopyridin-2-yl)acrylamide) (PNAcAPAAm) measured in DMSO-d<sub>6</sub>.

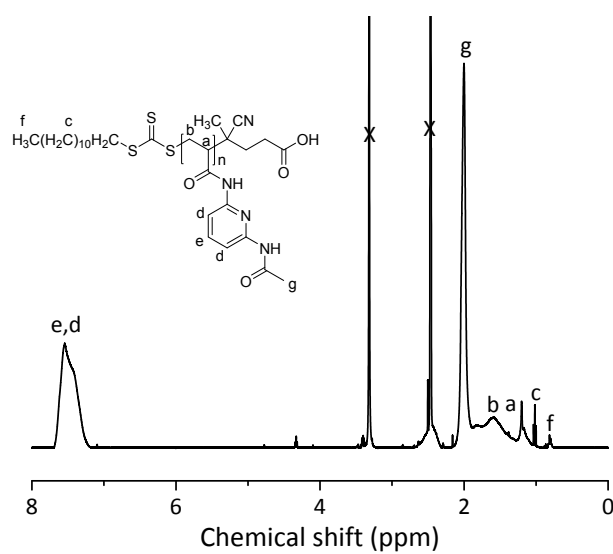

**Fig. S9.**  $^1\text{H}$ -NMR spectrum of poly(*N*-(6-acetamidopyridin-2-yl)acrylamide) (PNAcAPAAm) via RAFT polymerization measured in DMSO- $d_6$ .

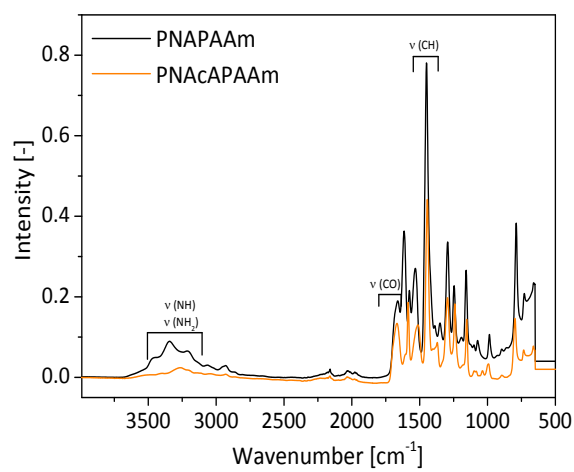

**Fig. S10.** ATR-FTIR measurements of the poly(*N*-(6-aminopyridin-2-yl)acrylamide) (PNAPAAm) and poly(*N*-(6-acetamidopyridin-2-yl)acrylamide) (PNAcAPAAm).

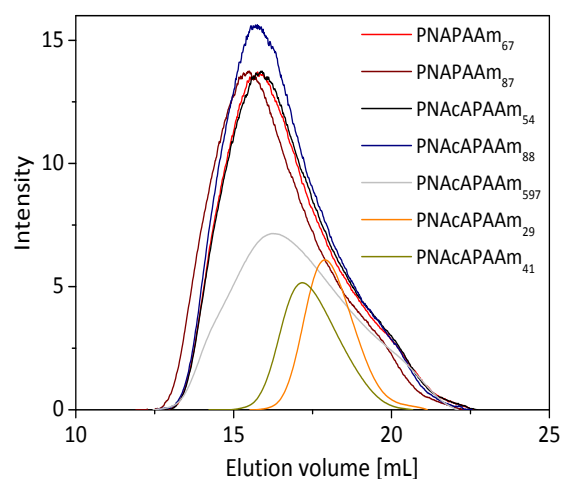

**Fig. S11.** GPC traces of PNAPAAm and PNACAPAAM with different molecular weights.

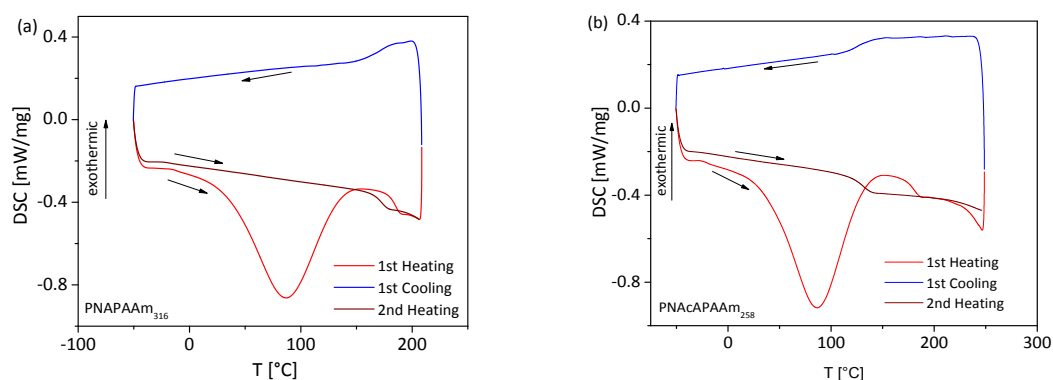

**Fig. S12.** DSC curves for (a) PNAPAAm<sub>87</sub> and (b) PNACAPAAM<sub>88</sub>.

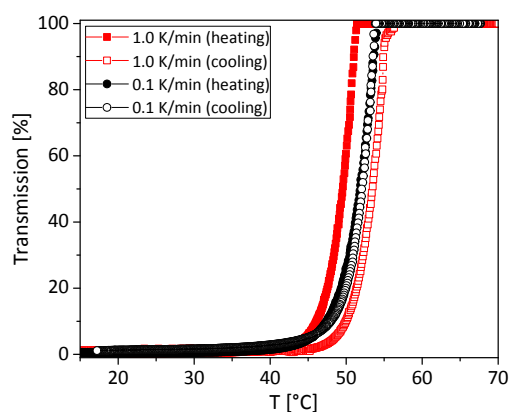

**Fig. S13.** Turbidity vs. temperature plot for PNACAPAAM<sub>88</sub> solution in water/EtOH mixture (50% v/v) at a fixed polymer concentration of 1 mg/mL. The measurements were done at two different temperature gradients of 1 K/min (red squares) and 0.1 K/min (black circles). No hysteresis was observed at temperature gradient of 0.1 K/min, whereas around 2-3°C of hysteresis were observed at temperature gradient of 1 K/min.

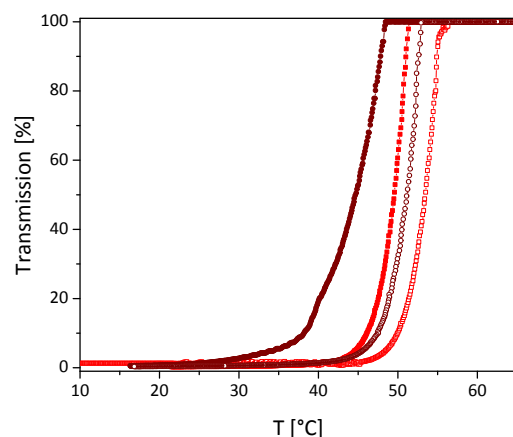

**Fig. S14.** Turbidity vs. temperature plot for PNAcPAAm<sub>88</sub> solution in water/EtOH mixture (50% v/v) at a fixed polymer concentration of 1 mg/mL. The measurements were done by keeping the polymer solution at 70 °C for an extended time of around 2h (wine circles) and without keeping polymer solution at higher temperature (red squares) before measurements. Open symbols for cooling and solid filled symbols for heating run. The temperature gradient was 1 K/min for both measurements.

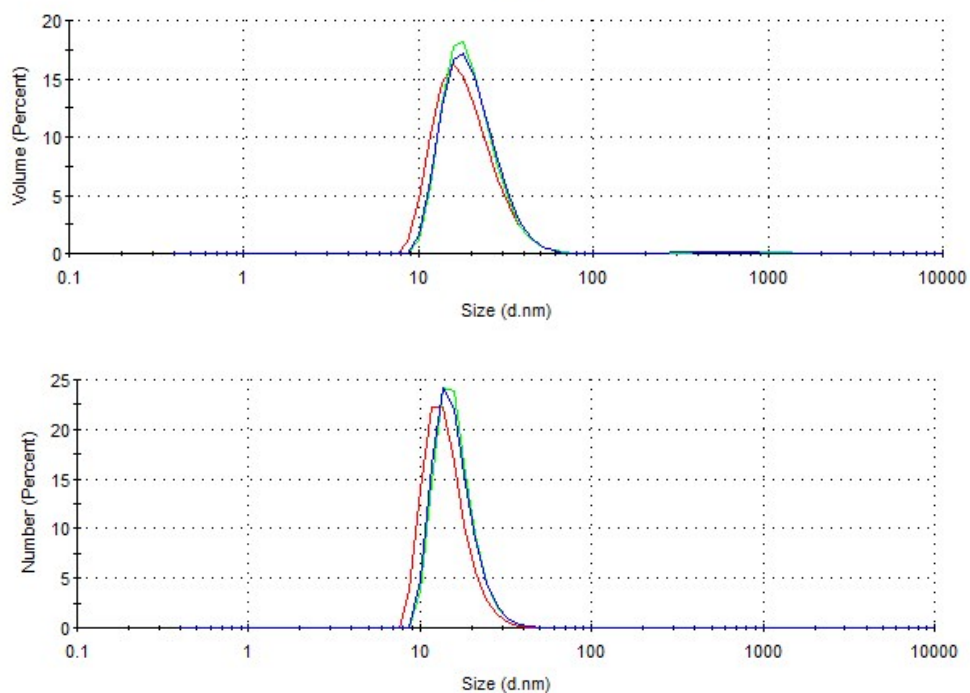

**Fig. S15.** Volume and number distribution of sizes in three consecutive runs for PNAcPAAm<sub>88</sub> in water/ethanol mixture (50% v/v) at fixed polymer concentration of 1 mg/mL. The temperature was fixed at 5 °C (below phase transition temperature). Red, green and blue line representing 1<sup>st</sup>, 2<sup>nd</sup> and 3<sup>rd</sup> measurements, respectively.



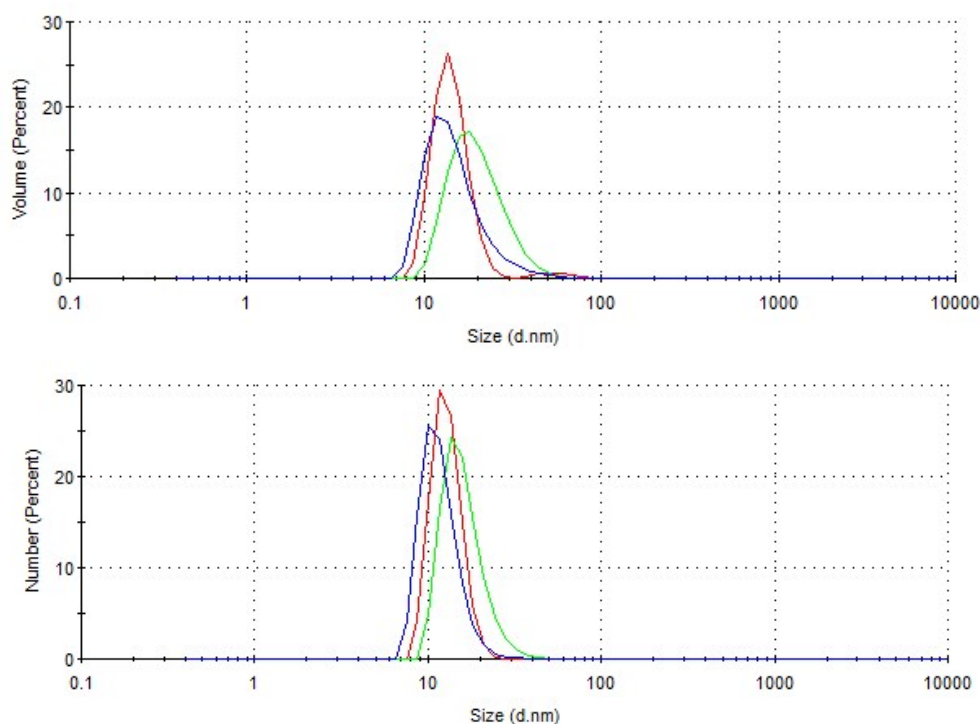

**Fig. S16.** Volume and number distribution of sizes of PNAcAPAAm<sub>88</sub> in different alcohol/water (60% v/v in alcohol) mixtures at fixed polymer concentration of 1 mg/mL above the phase transition temperature (65°C). Blue, red and green line representing water/MeOH, water/EtOH and water/iPrOH mixtures, respectively.

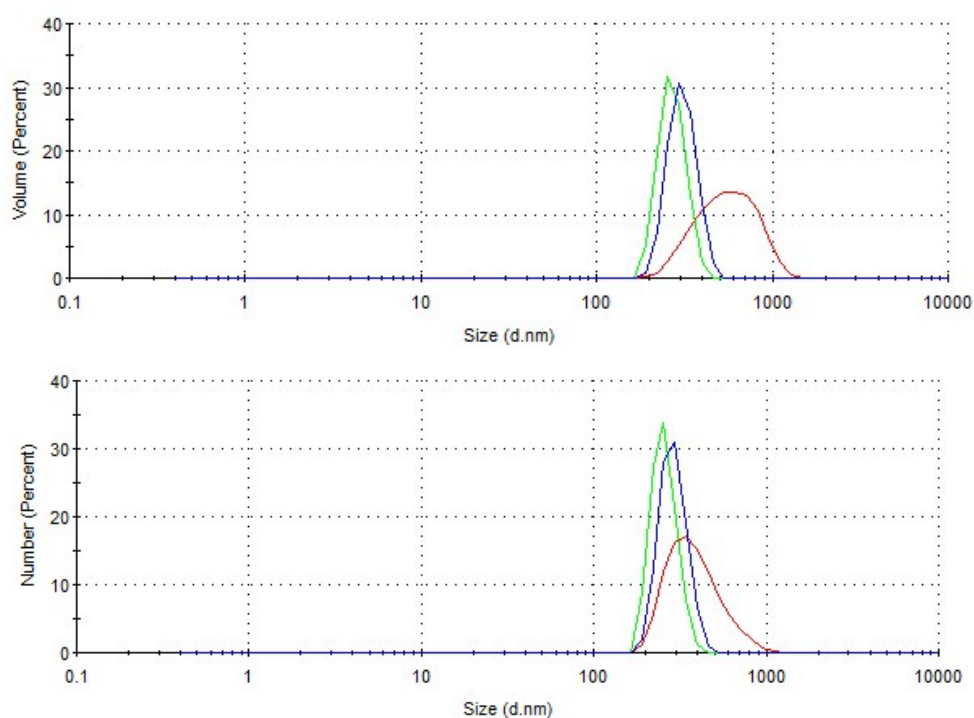

**Fig. S17.** Volume and number distribution of sizes of PNAcAPAAm<sub>88</sub> in different water/alcohol (60% v/v in alcohol) mixtures at fixed polymer concentration of 1 mg/mL below the phase transition temperature (5°C). Green, blue and red line represent for water/MeOH, water/EtOH and water/iPrOH mixtures, respectively.

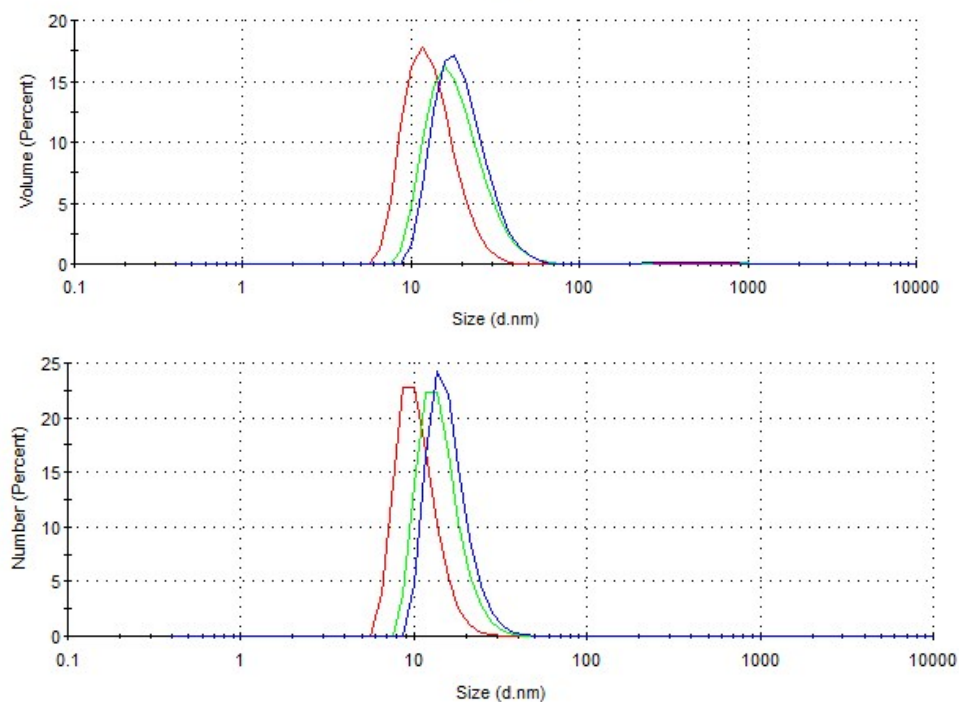

**Fig. S18.** Volume and number distribution of sizes of PNACAPAAm<sub>88</sub> in different ethanol content in water at fixed polymer concentration of 1 mg/mL above the phase transition temperature (70°C). Blue, green and red line representing for 50, 60 and 70% v/v of EtOH in water, respectively.

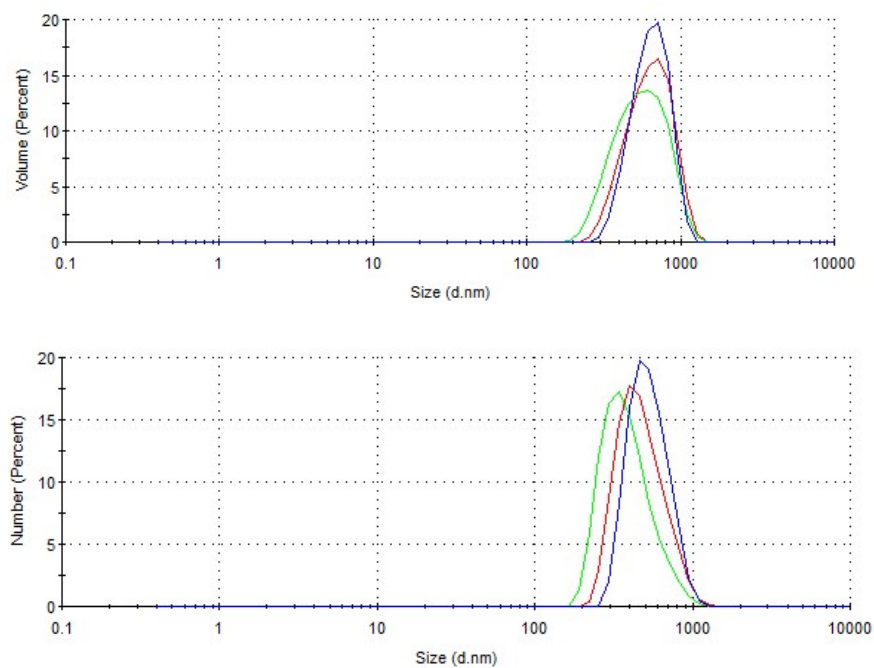

**Fig. S19.** Volume and number distribution of sizes of PNACAPAAm<sub>88</sub> in different ethanol content in water at fixed polymer concentration of 1 mg/mL above the phase transition temperature (5°C). Blue, red and green line representing for 50, 60 and 70% v/v of EtOH in water, respectively.

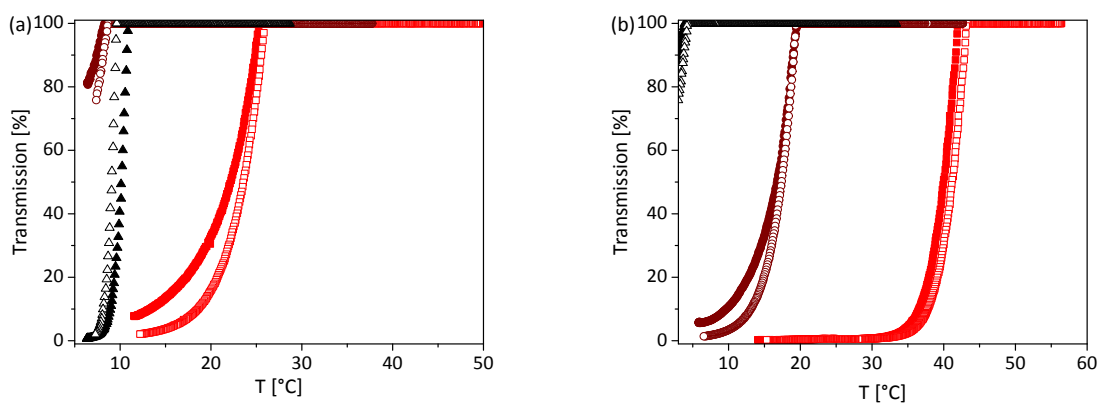

**Figure S20.** Transmittance versus temperature plots for PNACAPAAm synthesized via RAFT polymerization with  $M_w$  (a) 8.0 KDa and (b) 12.2 KDa in water/alcohol mixtures at fixed polymer concentration of 1 mg/mL. Red squares for water/MeOH (60% v/v in alcohol) mixture, wine circles for water/EtOH (50% v/v) mixture and black triangles for water/*i*PrOH (50% v/v) mixture. Open symbols represent cooling run and solid filled symbols represent heating run. The obtained  $T_{CP}$  values are tabulated in table 1.

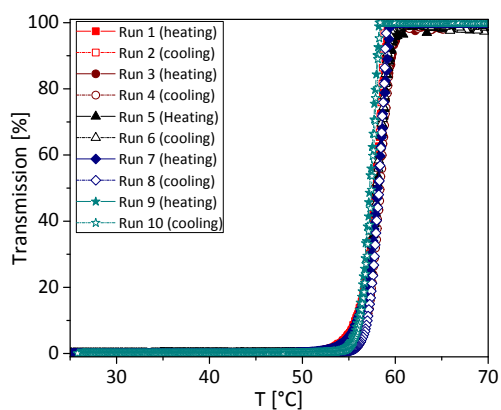

**Fig. S21.** Five consecutive turbidity curves (heating and subsequent cooling) of pNACAPAAm<sub>88</sub> with constant polymer concentration of 5 mg/mL in water/EtOH mixtures (50% v/v). At high concentration the hysteresis is less than 1°C.
